# Supplementary material for: Food Next Door: From Food Literacy to Citizenship on a College Campus
Source: MDPI journal article supplement (doi:10.3390/ijerph18020534), 2021-01-11
Supplement: s1 [file s1]

*The demographic portion of the survey was removed. For questions on the survey please contact [nmeyer2@uccs.edu](mailto:nmeyer2@uccs.edu)*

## **Food Literacy**

Please choose the best answer from the following options.

**1. Do you know what a Community Supported Agriculture (CSA) is?**

- ☐ Yes
- ☐ No
- ☐ I don't know

**2. Which of the following food items is NOT commonly part of a CSA share?**

- ☐ Vegetables
- ☐ Meat
- ☐ Pasta
- ☐ I don't know

**3. In which season is butternut squash commonly harvested?**

- ☐ Spring
- ☐ Summer
- ☐ Fall
- ☐ I don't know

**4. In which season are tomatoes typically harvested?**

- ☐ Spring
- ☐ Summer
- ☐ Fall
- ☐ I don't know

**5. In which season is zucchini typically harvested?**

- ☐ Spring
- ☐ Summer
- ☐ Fall
- ☐ I don't know

**6. Where do asparagus naturally grow?**

- ☐ Under the ground
- ☐ Above the ground
- ☐ On a tree
- ☐ I don't know

**7. Where does a garlic (bulb) naturally grow?**

- ☐ Under the ground
- ☐ Above the ground
- ☐ On a tree
- ☐ I don't know

**8. Where do cherries naturally grow?**

- ☐ Under the ground
- ☐ Above the ground
- ☐ On a tree
- ☐ I don't know

**9. On average, what percentage of their income do Americans spend on food?**

- ☐ 10%
- ☐ 20%
- ☐ 30%
- ☐ I don't know

**10. On average, how many miles does food travel from harvest to consumer?**

- ☐ 3000miles
- ☐ 1500miles
- ☐ 500miles
- ☐ I don't know

**11. The more fish we eat, the less will be available for those living in coastal regions who depend on it for survival.**

- ☐ True
- ☐ False
- ☐ I don't know

**12. Since the beginning of agriculture, biodiversity of edible plants has increased by 50%.**

- ☐ True
- ☐ False
- ☐ I don't know

**13. Eating a diet rich in biodiversity improves nutrition and health.**

- ☐ True
- ☐ False
- ☐ I don't know

**14. How much food is wasted in the U.S. annually?**

- ☐ 60%
- ☐ 40%
- ☐ 10%
- ☐ I don't know

**15. How many pounds of grains are needed to produce 1 lb. (pound) of conventionally raised beef?**

- ☐ 4lbs
- ☐ 8lbs
- ☐ 16lbs
- ☐ I don't know

**16. 30% of all carbon emissions come from agriculture.**

- ☐ True
- ☐ False
- ☐ I don't know

**17. A supermarket is an example of a local food store.**

- ☐ True
- ☐ False
- ☐ I don't know

**18. Of the following markets, which uses the least amount of energy?**

- ☐ Local grocery store
- ☐ Chain grocery store
- ☐ Farmers market
- ☐ I don't know

**19. Which of the following farming techniques is expected to deplete nutrients from the soil the fastest?**

- ☐ Monoculture
- ☐ Polyculture
- ☐ Permaculture
- ☐ I don't know

**20. Going to a farmers market has no effect on the local economy.**

- ☐ True
- ☐ False
- ☐ I don't know

**21. Do you know what a genetically modified organism (GMO) is?**

- ☐ Yes
- ☐ No
- ☐ I don't know

**22. In the U.S., which of the following is mostly a non GMO crop?**

- ☐ Corn
- ☐ Carrots
- ☐ Soy
- ☐ I don't know

**23. Do you know what a carbon footprint is?**

- ☐ Yes
- ☐ No

**24. Which of the following strategies has the smallest impact on our carbon footprint?**

- ☐ Eating less meat
- ☐ Eating locally
- ☐ Eating organically
- ☐ I don't know

**25. Which of the following protein sources has the lowest carbon footprint and the highest potential to boost health?**

- ☐ Beef
- ☐ Cheese
- ☐ Beans
- ☐ I don't know

**26. Have you heard of the Farm Bill?**

- ☐ Yes
- ☐ No
- ☐ I don't know

**27. Cucumbers can be best kept through fall and winter by which of the following?**

- ☐ Freezing
- ☐ Pickling
- ☐ Drying
- ☐ I don't know

**28. Which of the following does NOT celebrate food tradition?**

- ☐ Attending a cultural food festival
- ☐ Eating a frozen pizza in front of the TV
- ☐ Cooking and eating together
- ☐ I don't know

**29. Family meals can boost academic performance, nutrition and quality of life.**

- ☐ True
- ☐ False
- ☐ I don't know

**30. Gardening or farming are low-intensity activities and not strenuous enough to improve fitness.**

- ☐ True
- ☐ False
- ☐ I don't know

**31. Given the following options of locally and humanely raised animal proteins, which of them is the most sustainable choice in your diet?**

- ☐ Grass-fed beef
- ☐ Heritage turkey
- ☐ Local eggs
- ☐ I don't know

**32. Eating more vegetarian and vegan meals has no impact on one's health or sustainability.**

- ☐ True
- ☐ False
- ☐ I don't know

**33. When kids grow vegetables, they eat more vegetables.**

- ☐ True
- ☐ False
- ☐ I don't know

Thank you very much for completing this survey.
